# Supplementary material
Source: PubMed Central journal article supplement (PMC9709453)
Supplement: NIHMS1847699-supplement-1.pdf [file NIHMS1847699-supplement-1.pdf]

## Supplementary Methods

### Detection methods used to identify ABL-class cases by DCOG

[Modified from Boer et al., *Oncotarget* 2017]

#### Tyrosine kinase fusion detection

Detection of ABL-class tyrosine kinase fusion genes was performed by RT-PCR followed by Sanger sequencing using previously described primers.<sup>1,2</sup> We used targeted locus amplification for additional cases to detect fusion genes involving *ABL1*, *PDGFRB*, *CSF1R*, and *ABL2* (TLA, Cergentis, Utrecht, the Netherlands).<sup>3,4</sup> We used break apart FISH with *PDGFRB/CSF1R* and *ABL1* probes (Cytocell) to confirm fusions. The methods applied to each case depended on the type and amount of available patient material.<sup>2</sup>

#### Genome-wide DNA copy number arrays (array-CGH)

Copy number analysis was performed using Agilent SurePrint G3 Hmn 4x180K arrays (Agilent Technologies, Amstelveen, the Netherlands) co-hybridized with 1 µg patient DNA labeled with ULS-Cy5 and 1 µg reference genomic DNA male pool (G147A, Promega, Leiden, the Netherlands) labeled with ULS-Cy3 (Agilent Genomic DNA ULS Labeling Kit). Copy number microarray data were normalized using median log ratio in the CGHcall<sup>5</sup> version 2.14.0, centralized using CGHnormaliter<sup>6</sup> version 1.8.0, and segmented and called using CGHcall default settings (-1 for loss, 0 for diploid, 1 for gain and 2 for amplification) in R version 2.14.1.

#### Multiplex ligation-dependent probe amplification

The SALSA P335 ALL-*IKZF1* (a3) and the SALSA P202 Multiplex Ligation-dependent Probe Amplification (MLPA) assays (MRC-Holland) were used to identify or confirm genomic lesions on the following genes: *IKZF1*, *CDKN2A*, *CDKN2B*, *ETV6*, *PAX5*, *RB1*, *BTG1* and *EBF1* as described previously.<sup>7</sup> <sup>8</sup> In short, 125 ng of genomic DNA was used to generate DNA fragments with incorporated FAM nucleotides according to the manufacturer's protocol. The amplified fragments were quantified using an ABI-3130 genetic analyzer (Applied Biosystems, Carlsbad, CA). Peak intensities were normalized to the manufacturer's control probes and to a synthetic control reference generated from five normal DNA samples in the same MLPA run. A peak ratio lower than 0.75 was considered a deletion, a ratio between 0.75 and 1.3 was considered normal copy number, a ratio higher than 1.3 was considered a gain in copy number.

#### Targeted locus amplification

Targeted Locus Amplification (TLA) combined with deep-sequencing was used to detect fusion genes and sequence mutations in regions up to 100 kb around a pre-selected primer pair by crosslinking of physically proximal genomic sequences as described before.<sup>3</sup> Briefly, DNA and protein in 10-15 million viable leukemic blast cells were crosslinked in a 2% formaldehyde solution. Cells were lysed and DNA was digested with *NlaIII*, followed by ligation, de-crosslinking and DNA purification. DNA molecules were trimmed with *NspI* and ligated at a concentration of 5 ng/µl to promote intramolecular ligation to DNA fragments of approximately 2 kb. These chimeric fragments were PCR amplified, sonicated and adaptor-ligated for paired-end high-throughput Illumina sequencing. A total of 31 primer sets targeting 19 recurrently affected genes were designed and multiplexed, including the genes involved in the classical cytogenetic subtypes *MLL*, *RUNX1*, *TCF3*, and *IKZF1*, the tyrosine

kinase genes *ABL1*, *ABL2*, *PDGFRB*, *CSF1R*, *JAK1*, *JAK2*, *JAK3*, *FLT3*, and *TYK2*, and the cytokine signaling genes *CRLF2*, *EPOR*, *IL7R*, *TSLP*, *SH2B3*, and *IL2RB*.<sup>9</sup>

### Fluorescent in-situ hybridization (FISH)

FISH was performed on interface nuclei using break apart probes (Cytocell, Cambridge, UK) for *PDGFRB* and *ABL1*. The FISH probes for *PDGFRB* overlap with the neighboring *CSF1R* locus. At least 100 interphase nuclei were evaluated.

### Reverse transcriptase PCR (RT-PCR)

cDNA was synthesized from 1 µg total or copy RNA using M-MLV reverse transcriptase and combined oligo-dT and pdN6 priming in 20 µl (Promega, Madison, WI). PCR was performed on 2.5 µl cDNA using Taq polymerase, MgCl<sub>2</sub> and buffer from Applied Biosystems (Bleiswijk, Netherlands). For primer sequences see.<sup>2</sup>

### References

1. Roberts KG, Morin RD, Zhang J, et al. Genetic alterations activating kinase and cytokine receptor signaling in high-risk acute lymphoblastic leukemia. *Cancer Cell* 2012; **22**(2): 153-66.
2. Boer JM, Steeghs EM, Marchante JR, et al. Tyrosine kinase fusion genes in pediatric BCR-ABL1-like acute lymphoblastic leukemia. *Oncotarget* 2017; **8**(3): 4618-28.
3. de Vree PJ, de Wit E, Yilmaz M, et al. Targeted sequencing by proximity ligation for comprehensive variant detection and local haplotyping. *Nat Biotechnol* 2014; **32**(10): 1019-25.
4. Kuiper RP, Van Reijmersdal SV, Simonis M, et al. Targeted locus amplification & next generation sequencing for the detection of recurrent and novel gene fusions for improved treatment decisions in pediatric acute lymphoblastic leukemia. *Annual Meeting Abstracts Blood* 2015; **126**(23): 696.
5. van de Wiel MA, Kim KI, Vosse SJ, van Wieringen WN, Wilting SM, Ylstra B. CGHcall: calling aberrations for array CGH tumor profiles. *Bioinformatics* 2007; **23**(7): 892-4.
6. van Houte BP, Binsl TW, Hettling H, Pirovano W, Heringa J. CGHnormaliter: an iterative strategy to enhance normalization of array CGH data with imbalanced aberrations. *BMC Genomics* 2009; **10**: 401.
7. Van der Veer A, Waanders E, Pieters R, et al. Independent prognostic value of BCR-ABL1-like signature and IKZF1 deletion, but not high CRLF2 expression, in children with B-cell precursor ALL. *Blood* 2013; **122**(15): 2622-9.
8. Boer JM, Koenders JE, van der Holt B, et al. Expression profiling of adult acute lymphoblastic leukemia identifies a BCR-ABL1-like subgroup characterized by high non-response and relapse rates. *Haematologica* 2015; **100**(7): e261-4.
9. Escherich G, Zur Stadt U, Alawi M, Horstmann M. Rapid capture targeted next generation sequencing (NGS) for detection of genomic kinase- and cytokine receptor rearrangements in B-precursor acute lymphoblastic leukemia. *Annual Meeting Abstracts Blood* 2015; **126**(23): 2609.

## Supplementary Tables

**Supplementary Table S1:** Overview of ABL-class cases and NCI risk per study group

| Study group                                | Cases (N)  | NCI SR (N) | NCI HR (N) |
|--------------------------------------------|------------|------------|------------|
| ANZCHOG                                    | 2          | 0          | 2          |
| BFM (A, G, CH, Czech, Israel)/AIEOP-family | 33         | 7          | 26         |
| COALL                                      | 8          | 1          | 7          |
| COG                                        | 25         | 5          | 20         |
| DCOG                                       | 7          | 1          | 6          |
| JACLS/TCCSG/CCLSG                          | 11         | 2          | 9          |
| Ma-spore*                                  | 7          | 1          | 5          |
| UK ALL                                     | 29         | 11         | 18         |
| <b>Total</b>                               | <b>122</b> | <b>28</b>  | <b>93</b>  |

\* NCI risk of one patient is unknown

**Supplementary Table S2: Partner genes fused 5' of ABL-class genes**

| <b>ABL-class type</b> | <b>Fusion Partner</b> | <b>(N)</b> |
|-----------------------|-----------------------|------------|
| <b>ABL1 (N=40)</b>    | <i>ETV6</i>           | 7          |
|                       | <i>FOXP1</i>          | 2          |
|                       | <i>NUP214</i>         | 7          |
|                       | <i>RANBP2</i>         | 1          |
|                       | <i>RCSD1</i>          | 4          |
|                       | <i>SNX2</i>           | 2          |
|                       | <i>ZMIZ1</i>          | 16         |
|                       | Unknown/other         | 1          |
| <b>ABL2 (N=8)</b>     | <i>RCSD1</i>          | 4          |
|                       | <i>ZC3HAV1</i>        | 4          |
| <b>CSF1R (N=10)</b>   | <i>MEF2D</i>          | 2          |
|                       | <i>SSBP2</i>          | 8          |
| <b>PDGFRB (N=64)</b>  | <i>ATF7IP</i>         | 4          |
|                       | <i>CCDC88C</i>        | 1          |
|                       | <i>EBF1</i>           | 50         |
|                       | <i>ETV6</i>           | 1          |
|                       | <i>ZEB2</i>           | 1          |
|                       | Unknown/other         | 7          |

**Supplementary Table S3: Prognostic value of MRD corrected for NCI risk and treatment arm**

| Variable                        | EFS Hazard Ratio (95%CI) | Cox p-value |
|---------------------------------|--------------------------|-------------|
| <b>Cox univariate model</b>     |                          |             |
| MRD EOI $\geq 1 \times 10^{-2}$ | 3.3 (1.5-7.6)            | 0.004       |
| <b>Cox multivariate model 1</b> |                          |             |
| MRD EOI $\geq 1 \times 10^{-2}$ | 3.0 (1.3-6.9)            | 0.008       |
| NCI high risk                   | 2.2 (0.9-5.3)            | 0.079       |
| <b>Cox multivariate model 2</b> |                          |             |
| MRD EOI $\geq 1 \times 10^{-2}$ | 3.7 (1.5-9.0)            | 0.004       |
| Treatment arm HR                | 0.7 (0.3-1.6)            | 0.47        |

## Supplementary Figures

(A)

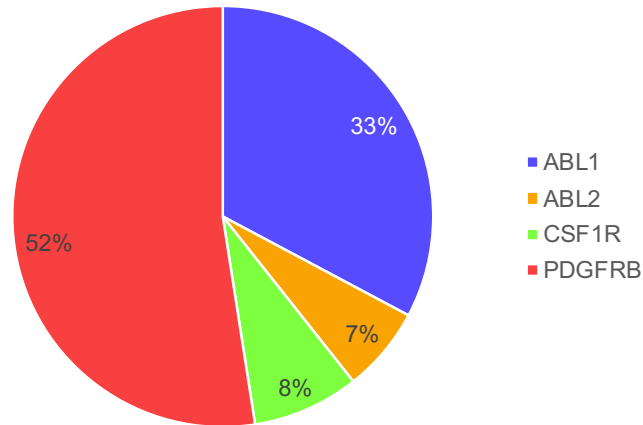

(B)

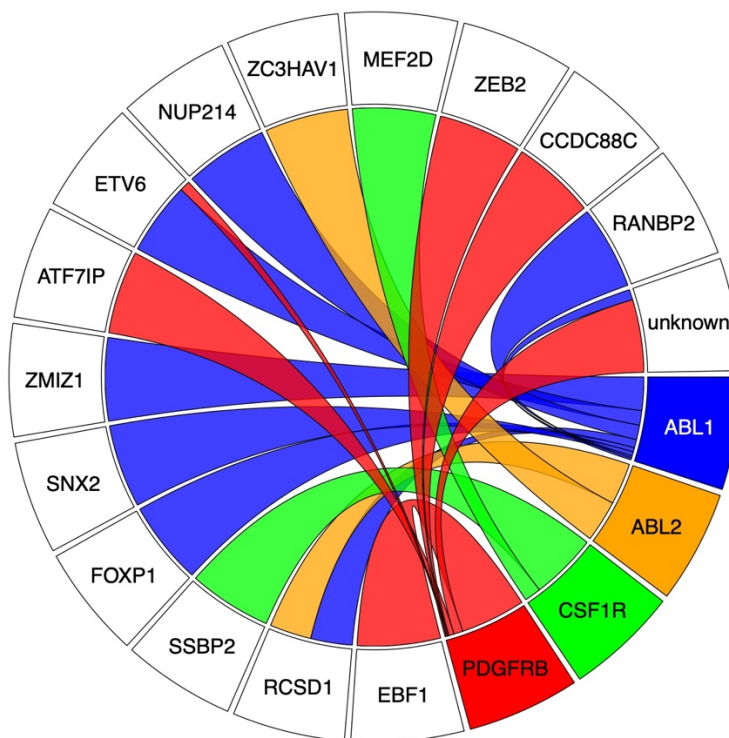

### Supplementary Figure S1: Distribution of ABL-class fusion genes in children with B-ALL

(A) Frequency of the four main ABL-class types detected in 122 newly diagnosed children with B-ALL.

(B) Circos plot of partner genes fused to *ABL1* (blue), *ABL2* (orange), *CSF1R* (green) and *PDGFRB* (red). Each partner gene is set to 100% and illustrates to which ABL-class gene the partner genes are most abundantly fused. E.g. *EBF1* is exclusively fused to *PDGFRB*. Starting from the viewpoint of the ABL-class gene, one can determine the frequency of partner genes to which the ABL-class gene is fused; e.g. *PDGFRB* can be fused to at least 5 partner genes (*EBF1*, *ATF7IP*, *ETV6*, *ZEB2*, *CCDC88C*), with *EBF1-PDGFRB* being the most prominent fusion partner.

**(A) Age at diagnosis**

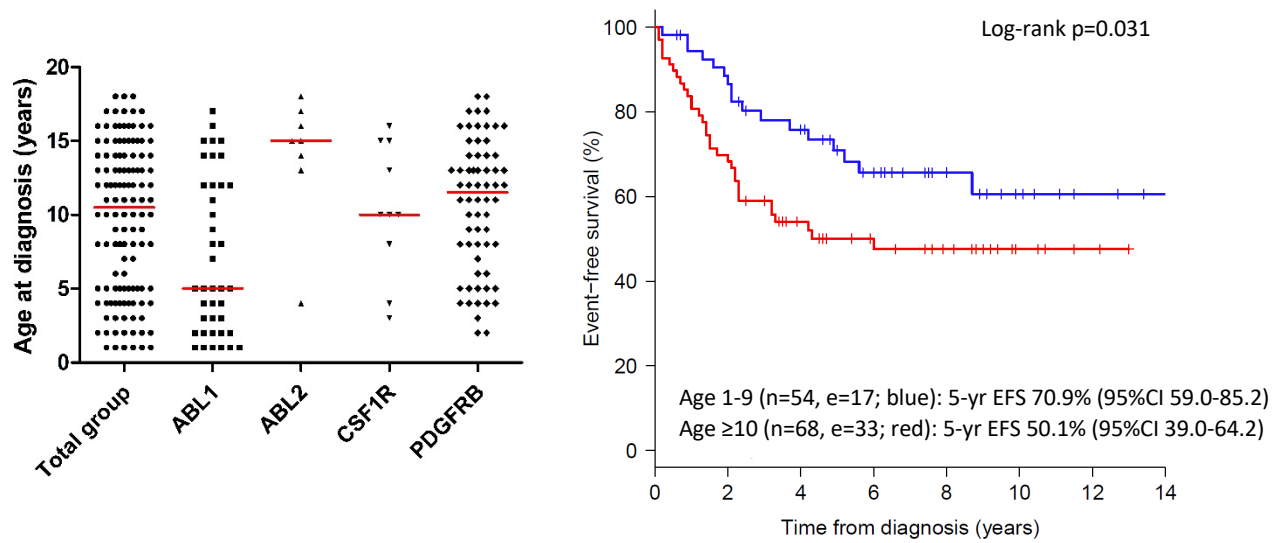

**(B) White blood cell count at diagnosis**

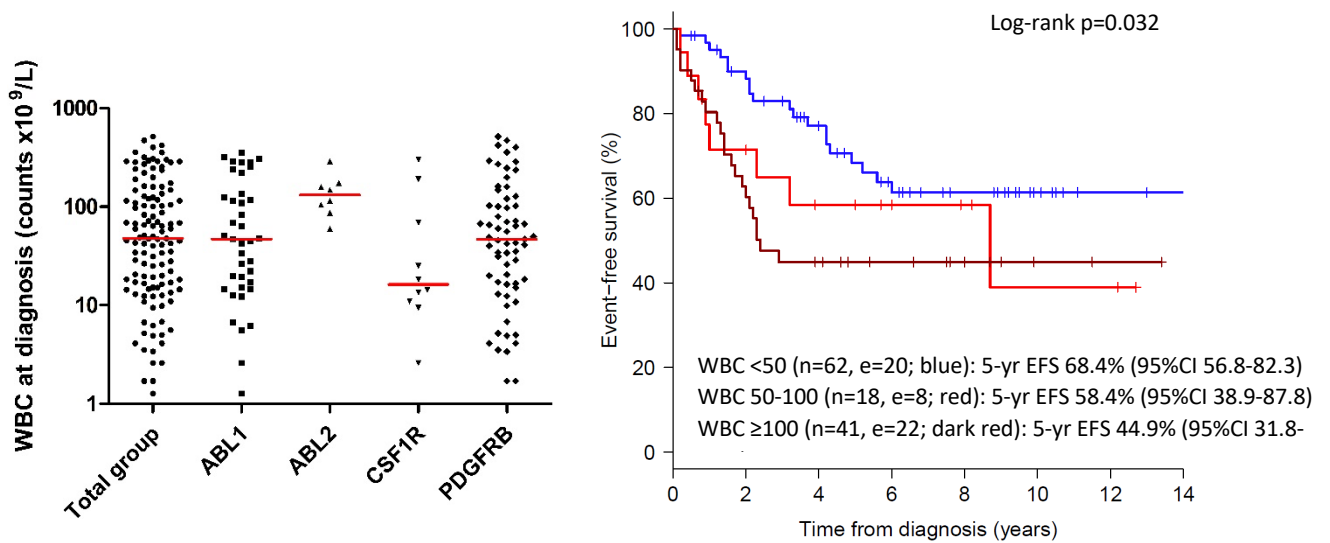

**Supplementary Figure S2: Age and white blood cell count (WBC) at diagnosis in ABL-class patients**

**(A)** Left panel: age distribution across four types of ABL-class, red line indicates median. Age was registered in years as discrete value. Kruskal-Wallis  $p=0.00028$ . *ABL2* versus *ABL1*,  $p=0.00022$  and *PDGFRB* versus *ABL1*,  $p=0.00084$ . Right panel: 5-year EFS by age categories 1-9 years ( $n=54$ ,  $e=17$ ; blue) 70.9% (95%CI 59.0-85.2) and 10-18 years ( $n=68$ ,  $e=33$ ; red) 50.1% (95%CI 39.0-64.2; log-rank  $p=0.031$ ).

**(B)** Left panel: distribution of WBC across four types of ABL-class, red line indicates median. Right panel: 5-year EFS by WBC categories  $<50 \times 10^9/L$  ( $n=62$ ,  $e=20$ ; blue) 68.4% (95%CI 56.8-82.3),  $50-100 \times 10^9/L$  ( $n=18$ ,  $e=8$ ; red) 58.4% (95%CI 38.9-87.8), and  $\geq 100 \times 10^9/L$  ( $n=41$ ,  $e=22$ ; dark red) 44.9% (95%CI 31.8-63.4; log-rank  $p=0.032$ ). WBC $<50 \times 10^9/L$  versus WBC $\geq 50 \times 10^9/L$ , log-rank  $p=0.012$ ;

**(A) Clinical outcome of ABL-class patients harboring an *IKZF1* deletion**

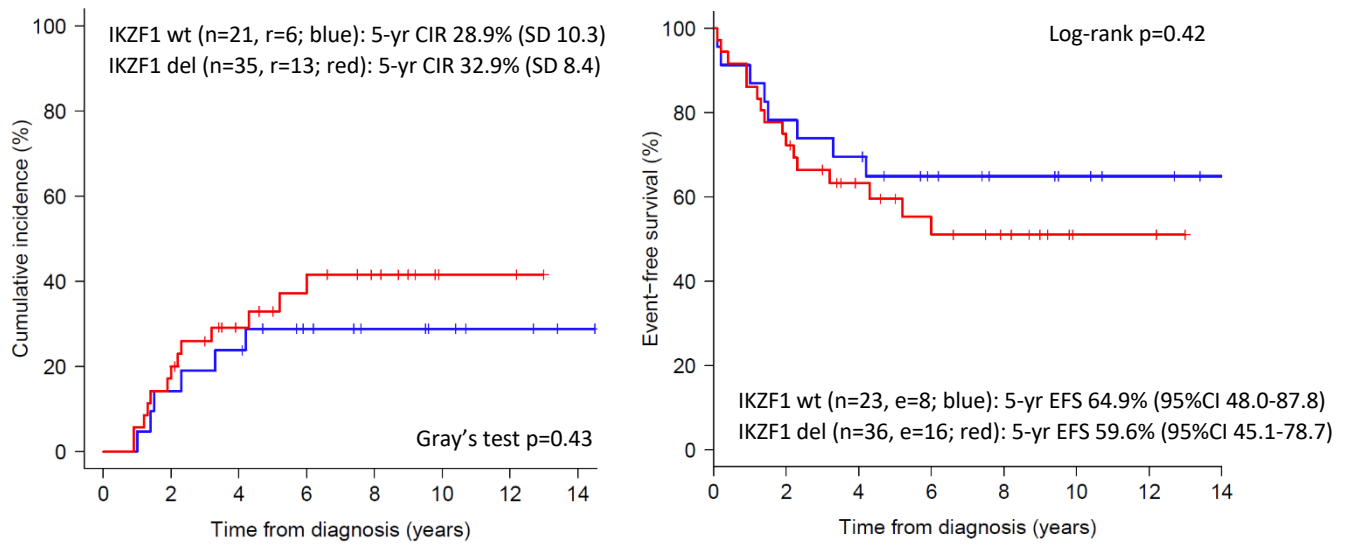

**(B) Clinical outcome of ABL-class patients harboring an *IKZF1* deletion with and without lesions in *PAX5/CDKN2A/2B***

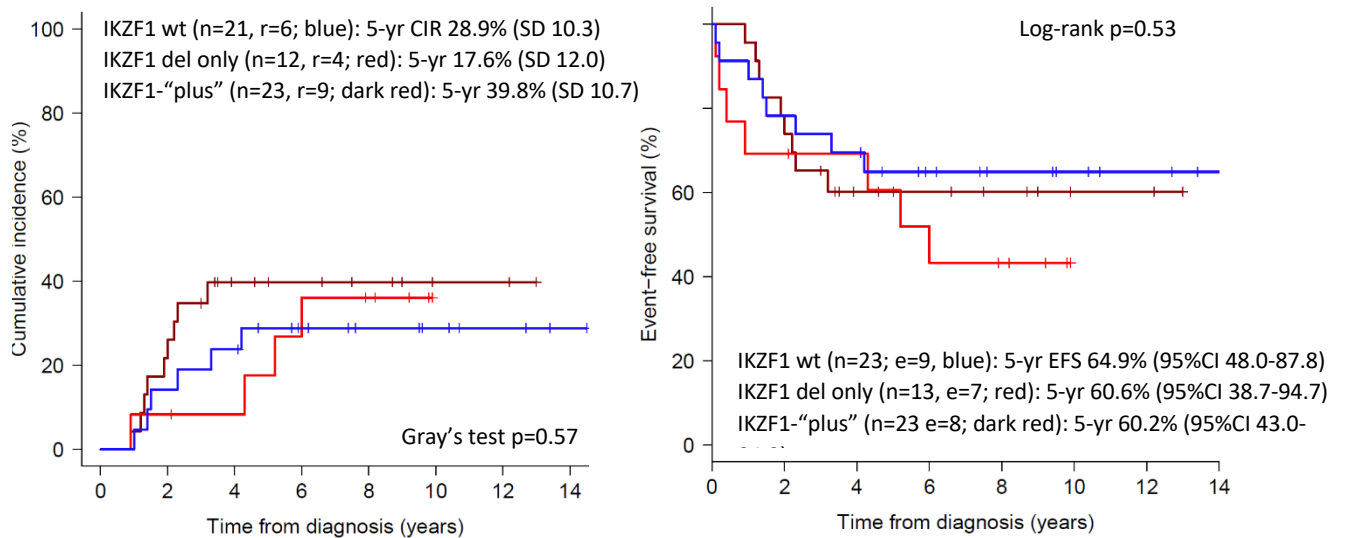

**Supplementary Figure S3: Prognostic value of *IKZF1* deletion w/w/o deletions in *PAX5*, *CDKN2A/2B***

**(A)** CIR (left panel) and EFS (right panel) curves of *IKZF1* wildtype (wt; blue) and *IKZF1*-deleted cases (red). 5-year CIR for 21 *IKZF1* wt 28.9% (SD 10.3) and 35 *IKZF1* del 32.9% (SD 8.4; Gray's test p=0.43). 5-year EFS for 23 *IKZF1* wt 64.9% (95%CI 48.0-87.8) and 36 *IKZF1* del 59.6% (95%CI 45.1-78.7; log-rank p=0.42).

**(B)** CIR (left panel) and EFS (right panel) curves of *IKZF1* wt (blue), *IKZF1*-deleted cases without (*IKZF1* del only; red) and with (*IKZF1*-“plus”, dark red) deletions in *PAX5* and/or *CDKN2A/2B*. 5-year CIR for 21 *IKZF1* wt 28.9% (SD 10.3), 12 *IKZF1* del only 17.6% (SD 12.0) and 23 *IKZF1* “plus” 39.8% (SD 10.7), Gray's p=0.57. 5-year EFS for 23 *IKZF1* wt 64.9% (95%CI 48.0-87.8), for 13 *IKZF1* del only 60.6% (95%CI 38.7-94.7) and for 23 *IKZF1*-“plus” 60.2% (95%CI 43.0-84.3); log-rank p=0.53).



(A)

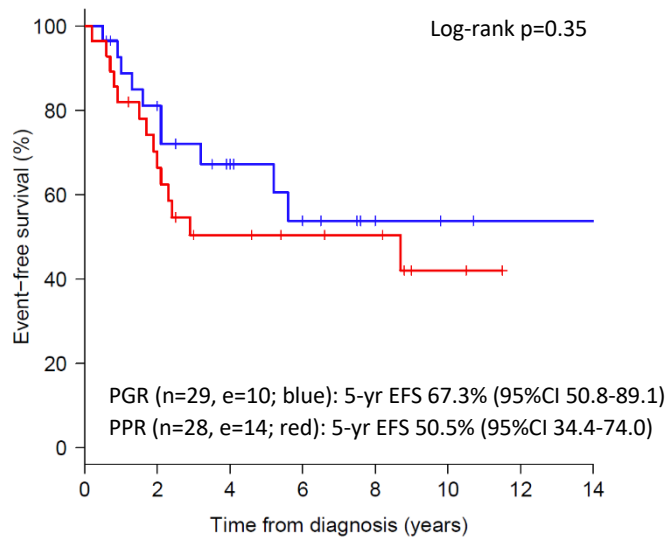

(B)

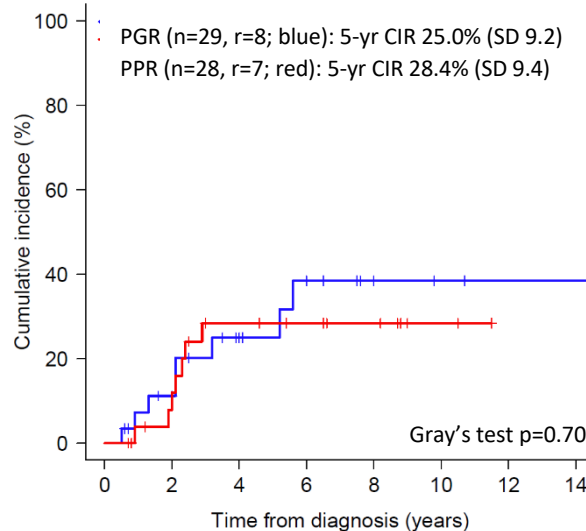

**Supplementary Figure S4: Prognostic value of the prednisone window response in ABL-class patients** A good window response was defined by  $<1,000$  blasts per  $\mu\text{l}$  of peripheral blood at day 8 of the therapeutic window, just before start of induction therapy. A good response (PGR) was detected in 29 out of 57 (51%) documented cases (blue line). A poor response (PPR) was defined by  $\geq 1,000$  blasts per  $\mu\text{l}$ , and was reported in 28 patients (49%), red line.

**(A)** EFS curve of patients with documented prednisone window response. 5-year EFS for good responders 67.3% (95%CI 50.8-89.1) and for poor responders 50.5% (95%CI 34.4-74.0), log-rank  $p=0.35$ . PPR versus PGR HR 1.46 (95% CI 0.65-3.29; Cox  $p=0.36$ ).

**(B)** CIR curve of patients with documented prednisone window response. 5-year CIR for good responders 25.0% (SD 9.2) and for poor responders 28.4% (SD 9.4), Gray's test  $p=0.70$ .

**(A)** Clinical outcome according to risk-stratification of total group of ABL-class B-ALL cases

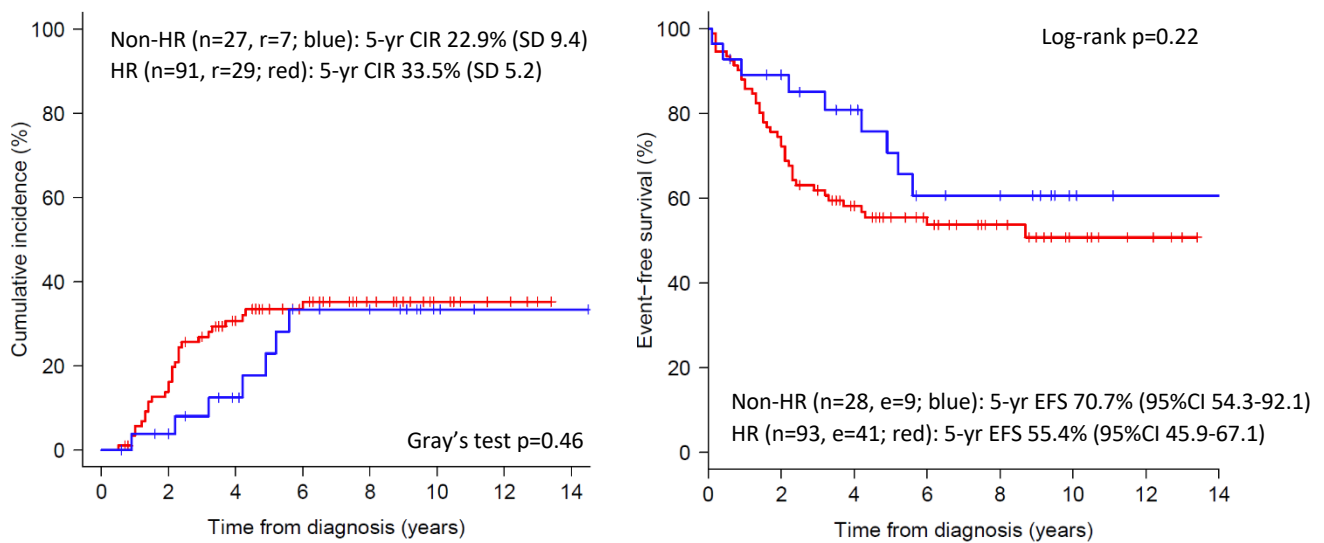

**(B)** Clinical outcome according to risk-stratification for *PDGFRB* fusion positive cases only

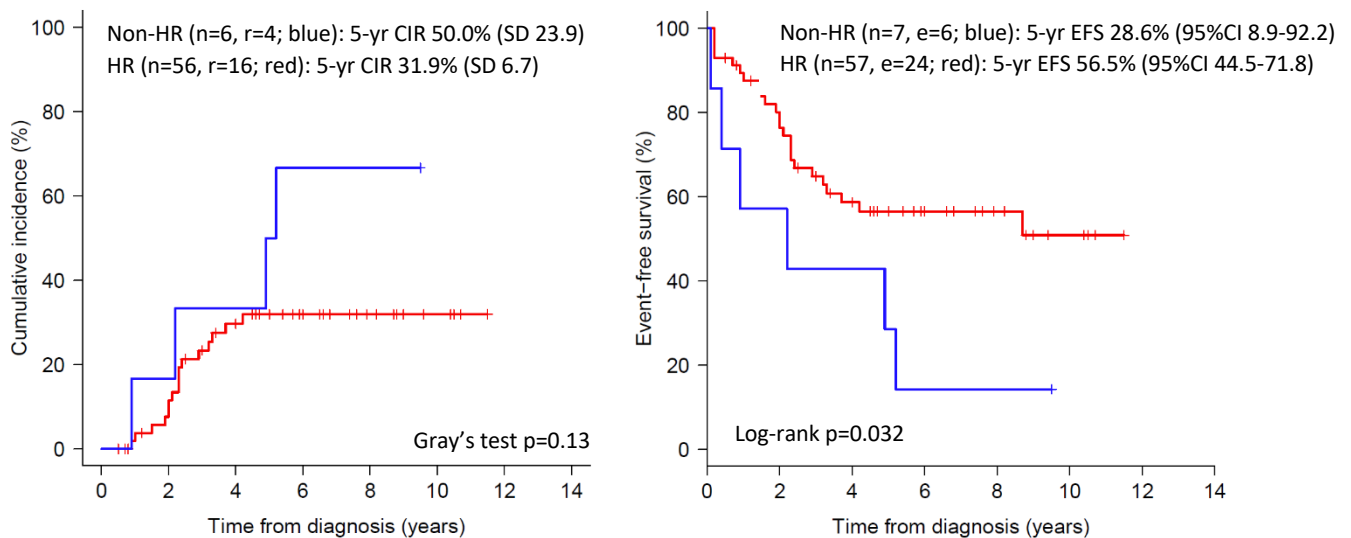

**Supplementary Figure S5: Clinical outcome of ABL-class cases according to the intention to treat**

**(A)** Total group of ABL-class cases. 5-year CIR of non-HR 22.9% (SD 9.4) and 33.5% (SD 5.2) for HR-treated cases. Gray's test p=0.46. 5-year EFS of non-HR 70.7% (95%CI 54.3-92.1) and 55.4% (95%CI 45.9-67.1) for HR-treated cases. Log-rank p=0.22.

**(B)** *PDGFRB*-fusion cases only. 5-year CIR of non-HR 50.0% (SD 23.9) and 31.9% (SD 6.7) for HR-treated cases. Gray's test p=0.13. 5-year EFS of non-HR 28.6% (95%CI 8.9-92.2) and 56.5% (95%CI 44.5-71.8) for HR-treated cases. Log-rank p=0.032. Hazard ratio for non-HR versus HR 2.57 (95% CI 1.05-6.30), Cox p=0.039.

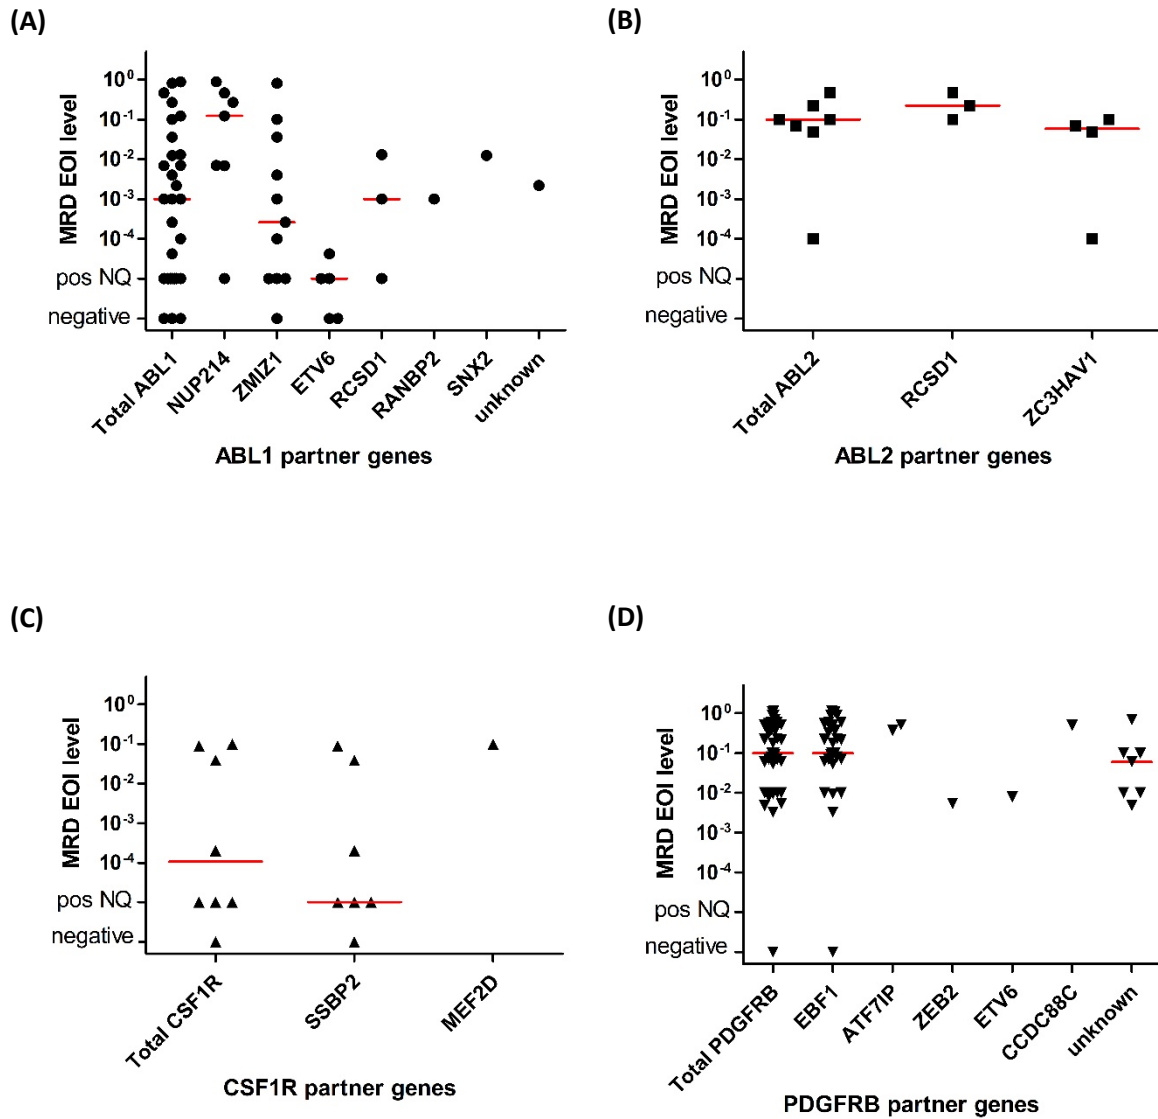

**Supplementary Figure S6: MRD levels for ABL-class fusion genes** Absolute MRD levels at the end of induction (MRD EOI) per ABL-class fusion type and their 5' partner genes. **(A)** *ABL1*, **(B)** *ABL2*, **(C)** *CSF1R* and **(D)** *PDGFRB* fusion cases. Red line represents the median MRD EOI level in each group. Pos NQ, positive but not quantifiable MRD level. Quantitative range for MRD detection was  $10^{-4}$ .

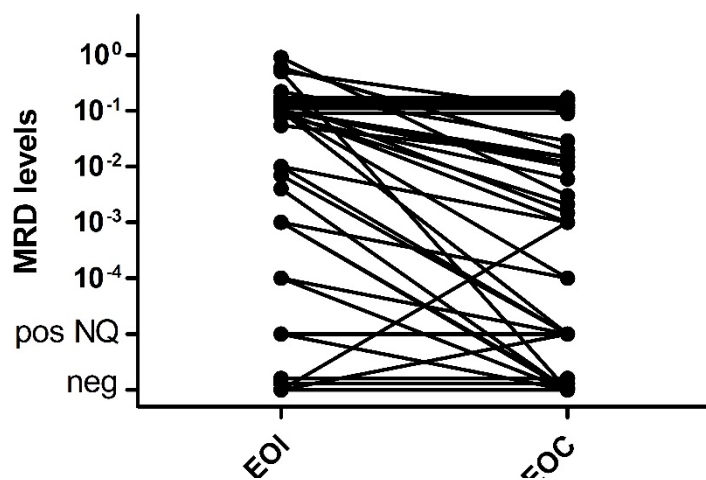

**Supplementary Figure S7: Kinetics of MRD levels in ABL-class patients** Paired analysis of end of induction (EOI) and end of consolidation (EOC) MRD levels in 41 ABL-class patients. Seven (17%) of these patients had negative or positive but not quantifiable MRD levels (i.e. below  $<10^{-4}$ ) at EOI which increased towards 16 (39%) at EOC. Wilcoxon matched pairs test,  $p < 0.0001$ .

(A)

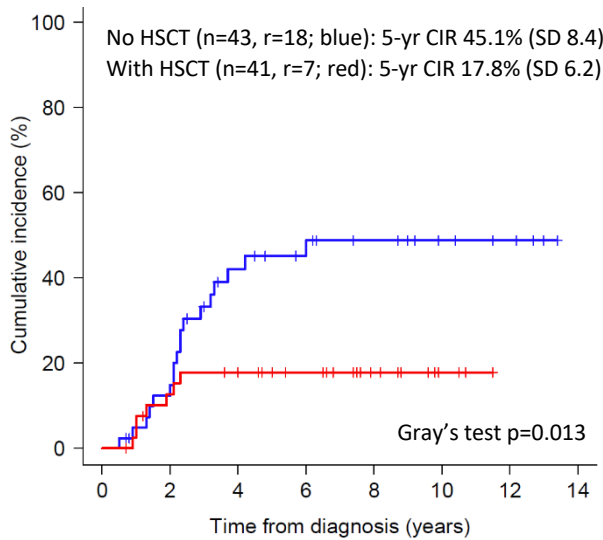

(B)

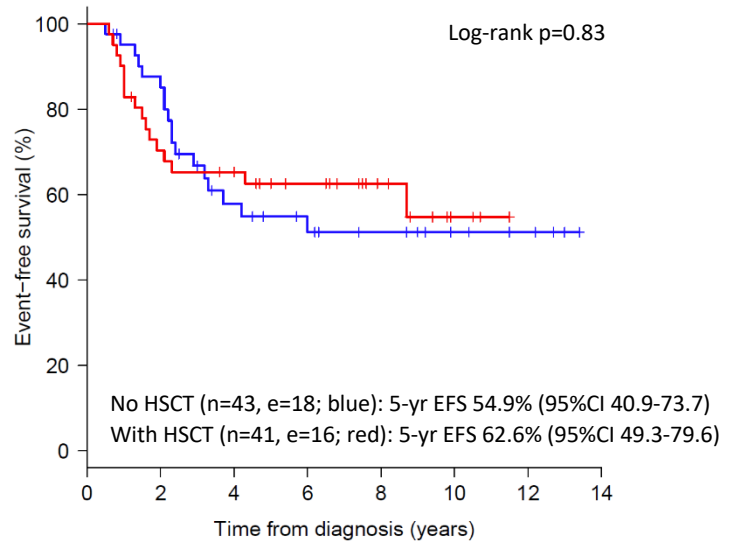

(C)

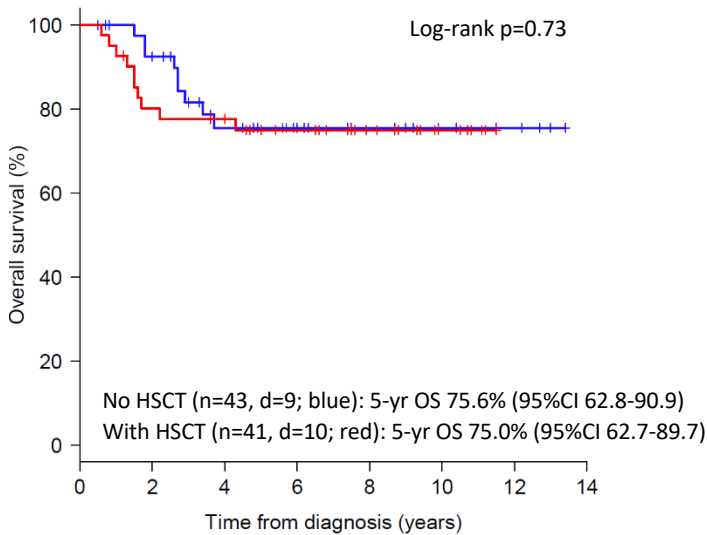

**Supplementary Figure S8: Effect of hematopoietic stem cell transplantation on outcome of HR-treated ABL-class patients** Outcome of HR-treated patients with and without hematopoietic stem cell transplantation (HSCT) given at first complete remission. Only HR-treated patients without an event in the first 6 months from diagnosis were included to (landmark analysis).

**(A)** CIR for HR-treated patients with (n=41, r=7; red) and without (n=43, r=18; blue) HSCT. Gray's test p=0.013.

**(B)** EFS for HR-treated patient who did (n=41, e=16; red) or did not (n=43, e=18; blue) receive an HSCT. Log-rank p=0.83.

**(C)** OS for HR-treated patient who did (n=41, d=10; red) or did not (n=43, d=9; blue) receive an HSCT. Log-rank p=0.73.

| Patients' features               | ABL class               |                         |                         |                           |                           | Refs #                                                   |
|----------------------------------|-------------------------|-------------------------|-------------------------|---------------------------|---------------------------|----------------------------------------------------------|
|                                  | ABL1                    | ABL2                    | CSF1R                   | PDGFRB                    |                           |                                                          |
| age/WBC                          | extreme unfavorable     | extreme unfavorable     | extreme unfavorable     | extreme unfavorable       | extreme unfavorable       | [1] (ABL class);<br>this study (ABL class and subtype)   |
| Pred window response             | favorable               | extreme unfavorable     | favorable               | favorable                 | extreme unfavorable       |                                                          |
| % IKZF1 deletion                 | extreme unfavorable     | extreme unfavorable     | unfavorable             | extreme unfavorable       | unfavorable               |                                                          |
| MRD levels                       | extreme unfavorable     | extreme unfavorable     | extreme unfavorable     | extreme unfavorable       | extreme unfavorable       |                                                          |
| EFS/%events                      | unfavorable             | extreme unfavorable     | favorable               | extreme unfavorable       | extreme unfavorable       |                                                          |
| <b>Response to TKI</b>           |                         |                         |                         |                           |                           |                                                          |
| <i>in vitro</i> (Ba/F3, Arf-/-)  | highly sensitive to TKI   | highly sensitive to TKI   | [2-6]                                                    |
| <i>ex vivo</i> (patients' cells) | highly sensitive to TKI | ?                       | highly sensitive to TKI | highly sensitive to TKI   | highly sensitive to TKI   | [5, 7]                                                   |
| <i>in vivo</i> mouse model       | highly sensitive to TKI | highly sensitive to TKI | highly sensitive to TKI | moderate sensitive to TKI | moderate sensitive to TKI | [2, 3, 5, 8]                                             |
| pediatric patients               | highly sensitive to TKI | highly sensitive to TKI | highly sensitive to TKI | ?                         | highly sensitive to TKI   | [3, 9-17] (case studies)<br>[1, 18] (small sized groups) |

### Color legend:

Patients' features:

|                                                                                     |                     |
|-------------------------------------------------------------------------------------|---------------------|
|    | extreme unfavorable |
|   | very unfavorable    |
|  | unfavorable         |
|  | favorable           |

Response to TKI:

|                                                                                     |                           |
|-------------------------------------------------------------------------------------|---------------------------|
|  | highly sensitive to TKI   |
|  | moderate sensitive to TKI |

**Supplementary Figure S9: Overview of compiled evidence** Clinical and prognostic features of ABL-class patients as group and per ABL-class fusion type (upper panel, excluding descriptive studies) and preclinical and patients' response data (case studies and small sized pilot studies) obtained about the sensitivity of ABL-class fusion genes to TKIs. *Ex vivo* studies comprise TKI efficacy assays using primary leukemic cells of patients or patient-derived xenograft cells. Question mark indicates absence of relevant data.

References of Figure S9:

1. Cario, G., et al., *Relapses and treatment-related events contributed equally to poor prognosis in children with ABL-class fusion positive B-cell acute lymphoblastic leukemia treated according to AIEOP-BFM protocols*. *Haematologica*, 2019.
2. Roberts, K.G., et al., *Genetic alterations activating kinase and cytokine receptor signaling in high-risk acute lymphoblastic leukemia*. *Cancer Cell*, 2012. **22**(2): p. 153-66.
3. Roberts, K.G., et al., *Targetable kinase-activating lesions in Ph-like acute lymphoblastic leukemia*. *N Engl J Med*, 2014. **371**(11): p. 1005-15.
4. Tomita, O., et al., *Sensitivity of SNX2-ABL1 toward tyrosine kinase inhibitors distinct from that of BCR-ABL1*. *Leuk Res*, 2014. **38**(3): p. 361-70.

5. Roberts, K.G., et al., *Oncogenic role and therapeutic targeting of ABL-class and JAK-STAT activating kinase alterations in Ph-like ALL*. *Blood Adv*, 2017. **1**(20): p. 1657-1671.
6. Ishibashi, T., et al., *Ph-like ALL-related novel fusion kinase ATF7IP-PDGFRB exhibits high sensitivity to tyrosine kinase inhibitors in murine cells*. *Exp Hematol*, 2016. **44**(3): p. 177-88 e5.
7. Lilljebjorn, H., et al., *RNA-seq identifies clinically relevant fusion genes in leukemia including a novel MEF2D/CSF1R fusion responsive to imatinib*. *Leukemia*, 2014. **28**(4): p. 977-9.
8. Tasian, S.K., et al., *Potent efficacy of combined PI3K/mTOR and JAK or ABL inhibition in murine xenograft models of Ph-like acute lymphoblastic leukemia*. *Blood*, 2017. **129**(2): p. 177-187.
9. Lengline, E., et al., *Successful tyrosine kinase inhibitor therapy in a refractory B-cell precursor acute lymphoblastic leukemia with EBF1-PDGFRB fusion*. *Haematologica*, 2013. **98**(11): p. e146-8.
10. Weston, B.W., et al., *Tyrosine kinase inhibitor therapy induces remission in a patient with refractory EBF1-PDGFRB-positive acute lymphoblastic leukemia*. *J Clin Oncol*, 2013. **31**(25): p. e413-6.
11. Kobayashi, K., et al., *TKI dasatinib monotherapy for a patient with Ph-like ALL bearing ATF7IP/PDGFRB translocation*. *Pediatr Blood Cancer*, 2015. **62**(6): p. 1058-60.
12. Perwein, T., et al., *Imatinib-induced long-term remission in a relapsed RCSD1-ABL1-positive acute lymphoblastic leukemia*. *Haematologica*, 2016. **101**(8): p. e332-5.
13. Schwab, C., et al., *EBF1-PDGFRB fusion in pediatric B-cell precursor acute lymphoblastic leukemia (BCP-ALL): genetic profile and clinical implications*. *Blood*, 2016. **127**(18): p. 2214-8.
14. Fazio, F., et al., *Efficacy of imatinib and chemotherapy in a pediatric patient with Philadelphia-like acute lymphoblastic leukemia with Ebf1-Pdgfrb fusion transcript*. *Leuk Lymphoma*, 2020. **61**(2): p. 469-472.
15. Decool, G., et al., *Efficacy of Tyrosine Kinase Inhibitor Therapy in a Chemotherapy-refractory B-cell Precursor Acute Lymphoblastic Leukemia With ZC3HAV1-ABL2 Fusion*. *Hemasphere*, 2019. **3**(3): p. e193.
16. Sakurai, Y., et al., *B-Cell Precursor-Acute Lymphoblastic Leukemia With EBF1-PDGFRB Fusion Treated With Hematopoietic Stem Cell Transplantation and Imatinib: A Case Report and Literature Review*. *J Pediatr Hematol Oncol*, 2020.
17. Zaliova, M., et al., *Characterization of leukemias with ETV6-ABL1 fusion*. *Haematologica*, 2016. **101**(9): p. 1082-93.
18. Tanasi, I., et al., *Efficacy of tyrosine kinase inhibitors in Ph-like acute lymphoblastic leukemia harboring ABL-class rearrangements*. *Blood*, 2019. **134**(16): p. 1351-1355.
